# Supplementary material for: Two-Dimensional Perovskite Crystals Formed by Atomic Layer Deposition of CaTiO3 on γ-Al2O3
Source: Nanomaterials (Basel). 2021 Aug 27;11(9):2207. doi: 10.3390/nano11092207 (PMC8469333; doi:10.3390/nano11092207)
Supplement: Supplementary file 1 [file nanomaterials-11-02207-s001.zip › nanomaterials-1348056-supplementary.pdf]

## Supplementary Materials

# Two-Dimensional Perovskite Crystals Formed by Atomic Layer Deposition of $\text{CaTiO}_3$ on $\gamma\text{-Al}_2\text{O}_3$

Tianyu Cao, Ohhun Kwon, Chao Lin, John M. Vohs and Raymond J. Gorte \*

Department of Chemical and Biomolecular Engineering, University of Pennsylvania, Philadelphia, PA 19104, USA; caot@seas.upenn.edu (T.C.); ohhun@seas.upenn.edu (O.K.); linchao@seas.upenn.edu (C.L.); vohs@seas.upenn.edu (J.M.V.)

\* Correspondence: gorte@seas.upenn.edu

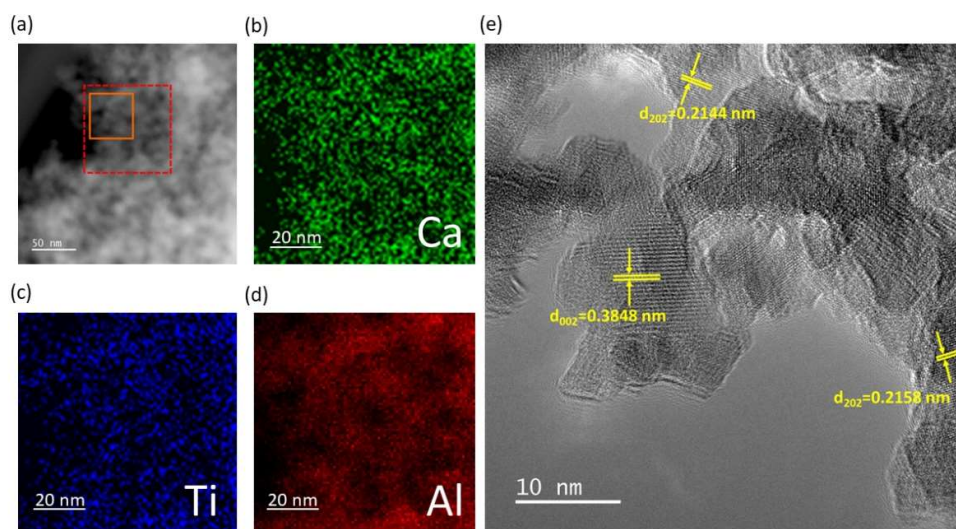

**Figure S1.** (a) High angle annular dark field (HAADF) STEM image of the 18 wt.%  $\text{CaTiO}_3/\text{Al}_2\text{O}_3$  sample; (b), (c) and (d) are EDS maps of Ca, Ti and Al, taken from the region indicated by the dashed red frame; (e) HR-TEM of the sample, image acquired from the orange framed region.

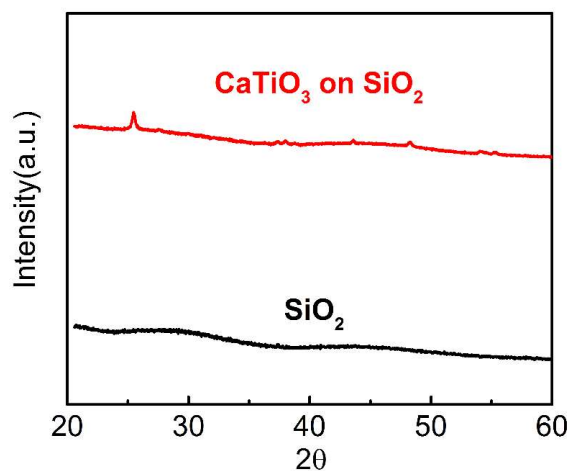

**Figure S2.** XRD patterns of CaTiO<sub>3</sub> deposited on SiO<sub>2</sub>, the black line denotes bare SiO<sub>2</sub> and red line denotes CaTiO<sub>3</sub>/SiO<sub>2</sub>.

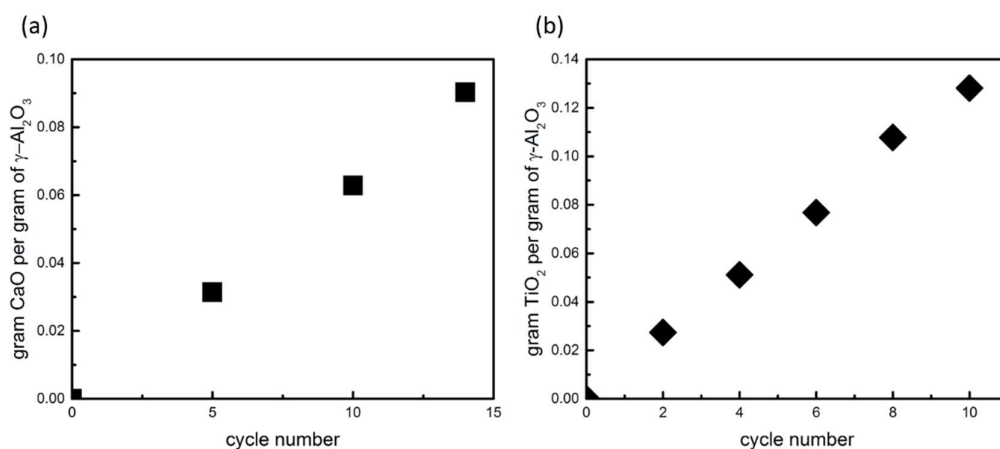

**Figure S3.** Growth rate of CaO, TiO<sub>2</sub> on  $\gamma$ -Al<sub>2</sub>O<sub>3</sub> as a function of ALD cycles. (a)CaO; (b)TiO<sub>2</sub>.

#### Preparation of CaTiO<sub>3</sub> film on the surface of SiO<sub>2</sub>

CaO and TiO<sub>2</sub> were deposited to SiO<sub>2</sub> support with ALD. Deposition temperature as well as the precursors used are the same with that has been described in the case of CaTiO<sub>3</sub>/Al<sub>2</sub>O<sub>3</sub>. The silica used was Q-10 SiO<sub>2</sub> powder (CARIACT, Fuji Silysia Chemical Ltd. Greenville, NC, USA). It was calcined in air at 1173 K for 24 h to stabilize. After this thermal treatment, specific area of the SiO<sub>2</sub> was 180 m<sup>2</sup>/g.

Growth rate of Ca on the surface of SiO<sub>2</sub> was measured to be  $5.2 \times 10^{13}$  atom/cm<sup>2</sup> cycle, and that for Ti was  $7.2 \times 10^{13}$  /cm<sup>2</sup> cycle. After every six cycles of CaO, we deposited four cycles of TiO<sub>2</sub>, to achieve the 1: 1 stoichiometric ratio between Ca and Ti. Weight of the sample was tracked after each cycle. The ALD process added 0.37 g of CaTiO<sub>3</sub> to every gram of SiO<sub>2</sub> (the weight loading was around 27%), equivalent to a film of 0.5 nm thick. Growth rate of CaO, TiO<sub>2</sub> on SiO<sub>2</sub> as a function of ALD cycles are presented in **Error! Reference source not found.**.

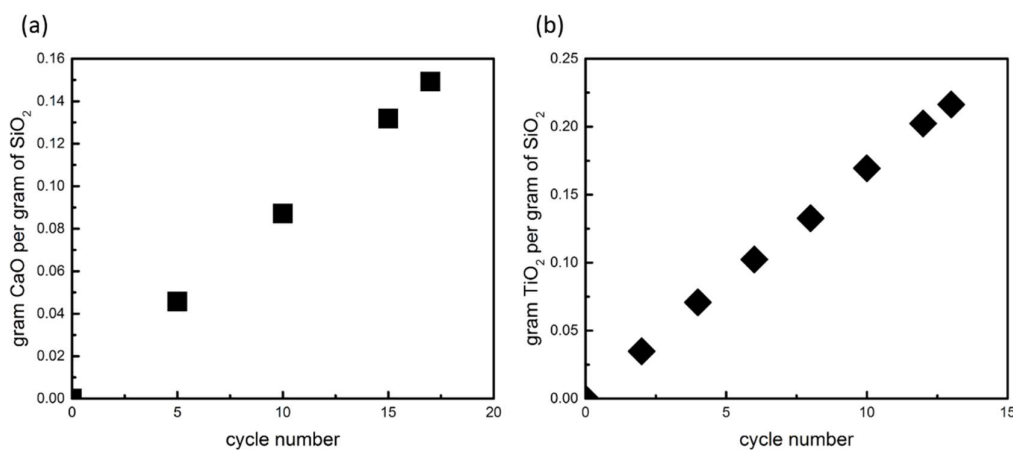

**Figure S4.** Growth rate of CaO, TiO<sub>2</sub> on SiO<sub>2</sub> as a function of ALD cycles. (a)CaO; (b)TiO<sub>2</sub>.

**Table S1.** Lattice perimeters and d-spacing values of standard  $\text{CaTiO}_3$  crystal system.

| <b><math>\text{CaTiO}_3</math>, orthorhombic, a=0.5386; b=0.5432; c=0.7610 (nm)</b> |                       |
|-------------------------------------------------------------------------------------|-----------------------|
| <b>(hkl)</b>                                                                        | <b>d-spacing (nm)</b> |
| (101)                                                                               | 0.4396                |
| (020)                                                                               | 0.2716                |
| (200)                                                                               | 0.2692                |
| (121)                                                                               | 0.2311                |
| (002)                                                                               | 0.3805                |
| (202)                                                                               | 0.2198                |
| (040)                                                                               | 0.1358                |
| (321)                                                                               | 0.1470                |
| (240)                                                                               | 0.1213                |
| (042)                                                                               | 0.1279                |
| (123)                                                                               | 0.1753                |
